# Supplementary material for: A novel LRP1-binding peptide L57 that crosses the blood brain barrier
Source: PubMed Central journal article supplement — Biochem Biophys Rep. 2017 Aug 12;12:135–9. doi: 10.1016/j.bbrep.2017.07.003 (PMC5645116; doi:10.1016/j.bbrep.2017.07.003), 2017-08-12
Supplement: mmc2.pdf [file mmc2.pdf]

## Supplementary Data

### **A novel LRP1-binding peptide L57 that crosses the blood brain barrier**

Kotaro Sakamoto, Tokuyuki Shinohara, Yusuke Adachi,

Taiji Asami, Tetsuya Ohtaki

Pharmaceutical Research Division, Takeda Pharmaceutical Company Limited,  
Fujisawa 251-8555, Japan

#### Contents

|                                                                          |    |
|--------------------------------------------------------------------------|----|
| Fig. S1. Plasma stability of the synthetic peptide, L57.....             | S2 |
| Fig. S2. Brain uptake of Angiopep-2 and Angiopep-7 in mice.....          | S2 |
| Table S1. Brain uptake of <sup>125</sup> I-labeled peptides in mice..... | S3 |

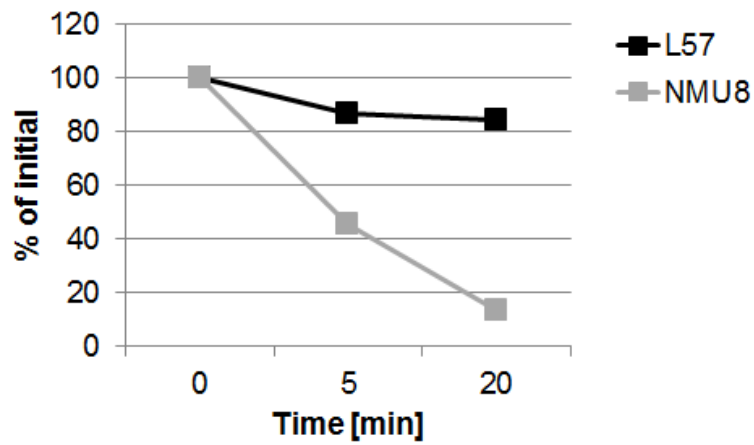

**Fig. S1. Plasma stability of the synthetic peptide, L57.** The remaining amount of peptide (%) in mouse plasma was measured at the indicated time points (0, 5, and 20 min). NMU8 (gray squares) is a linear octapeptide that was used as a control peptide.

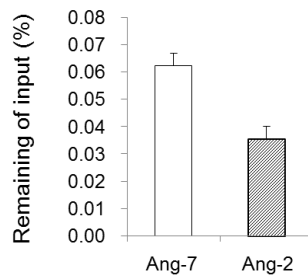

**Fig. S2. Brain uptake of Angiopep-2 and Angiopep-7 in mice.** Brain uptake of  $^{125}\text{I}$ -labeled peptides [Angiopep-2 (Ang-2), Angiopep-7 (Ang-7)] was evaluated by *in situ* brain perfusion in mice. Radioisotope counts in the right brain hemisphere were measured after 5 min of perfusion. Data are means + SDs (n = 3).

**Table S1**Brain uptake of <sup>125</sup>I-labeled peptides in mice.

| Name       | Sequence               | <i>In situ</i> brain perfusion (% input) |
|------------|------------------------|------------------------------------------|
| Angiopep-2 | TFFYGGSRGKRNNFKTEEY-OH | 0.035 ± 0.005                            |
| Angiopep-7 | TFFYGGSRGRRNNFRTEEY-OH | 0.062 ± 0.004                            |

Data are means ± SDs (n = 3).
